# Supplementary material
Source: PubMed Central journal article supplement (PMC6547371)
Supplement: NIHMS1031647-supplement-1.pdf [file NIHMS1031647-supplement-1.pdf]

**SUPPLEMENTAL TABLE 1: 4-year Analysis Included and Excluded *R117H* or *F508del* Patient Demographic and Clinical Characteristics.**

| <i>CFTR</i> gene mutation               | <i>R117H</i><br>(≥ 6 years old)                              |                                                                 | <i>F508del</i><br>(≥ 6 years old)                           |                                                                |                                                                   | <i>R117H</i> vs.<br><i>F508del</i>                          |                                          |
|-----------------------------------------|--------------------------------------------------------------|-----------------------------------------------------------------|-------------------------------------------------------------|----------------------------------------------------------------|-------------------------------------------------------------------|-------------------------------------------------------------|------------------------------------------|
| Characteristic                          | Patients<br>Included in<br>the 4-year<br>analysis<br>(n=156) | Patients<br>Excluded<br>from the 4-<br>year analysis<br>(n=335) | Included<br>vs.<br>Excluded<br>Patients<br><i>P</i> -value* | Patients<br>Included in<br>the 4-year<br>analysis<br>(n=6,251) | Patients<br>Excluded<br>from the 4-<br>year analysis<br>(n=3,793) | Included<br>vs.<br>Excluded<br>Patients<br><i>P</i> -value* | Excluded<br>Patients<br><i>P</i> -value* |
| Age, years                              |                                                              | [n=304]                                                         |                                                             |                                                                | [n=3,119]                                                         |                                                             |                                          |
| mean (SD)                               | 29.2 (17.2)                                                  | 30.5 (15.7)                                                     | 0.39                                                        | 17.0 (9.1)                                                     | 21.1 (10.4)                                                       | <0.001                                                      | <0.001                                   |
| Female, %                               | 51.9                                                         | 51.3                                                            | 0.90                                                        | 47.3                                                           | 46.1                                                              | 0.24                                                        | 0.067                                    |
| Year of CF diagnosis                    |                                                              |                                                                 |                                                             |                                                                |                                                                   |                                                             |                                          |
| median                                  | 1998                                                         | 2002                                                            | <0.001                                                      | 1992                                                           | 1987                                                              | <0.001                                                      | <0.001                                   |
| min, max                                | 1958, 2006                                                   | 1957, 2010                                                      |                                                             | 1949, 2006                                                     | 1947, 2010                                                        |                                                             |                                          |
| Sweat chloride                          | [n=126]                                                      | [n=248]                                                         |                                                             | [n=5,729]                                                      | [n=3,369]                                                         |                                                             |                                          |
| mmol/L, mean (SD)                       | 77.8 (23.9)                                                  | 69.5 (23.9)                                                     | 0.001                                                       | 102.6 (16.3)                                                   | 103.4 (17.2)                                                      | 0.021                                                       | <0.001                                   |
| Height <i>z</i> -score                  |                                                              | [n=304]                                                         |                                                             |                                                                | [n=3,119]                                                         |                                                             |                                          |
| mean (SD)                               | 0.11 (1.03)                                                  | 0.07 (1.09)                                                     | 0.70                                                        | -0.51 (1.01)                                                   | -0.55 (1.05)                                                      | 0.036                                                       | <0.001                                   |
| Weight <i>z</i> -score                  |                                                              | [n=301]                                                         |                                                             |                                                                | [n=3,114]                                                         |                                                             |                                          |
| mean (SD)                               | 0.46 (1.14)                                                  | 0.62 (1.25)                                                     | 0.18                                                        | -0.41 (1.02)                                                   | -0.69 (1.22)                                                      | <0.001                                                      | <0.001                                   |
| BMI <i>z</i> -score                     |                                                              |                                                                 |                                                             |                                                                |                                                                   |                                                             |                                          |
| mean (SD)                               | 0.41 (1.07)                                                  | 0.56 (1.21)                                                     | 0.21                                                        | -0.20 (0.96)                                                   | -0.52 (1.20)                                                      | <0.001                                                      | <0.001                                   |
| ppFEV <sub>1</sub> baseline first visit |                                                              | [n=304]                                                         |                                                             |                                                                | [n=3,119]                                                         |                                                             |                                          |
| mean (SD)                               | 79.0 (22.2)                                                  | 79.4 (24.7)                                                     | 0.86                                                        | 77.3 (23.0)                                                    | 63.7 (27.5)                                                       | <0.001                                                      | <0.001                                   |

|                                                 |             |             |       |             |             |        |        |
|-------------------------------------------------|-------------|-------------|-------|-------------|-------------|--------|--------|
| ppFEV <sub>1</sub> best baseline year value     |             | [n=304]     |       |             | [n=3,119]   |        |        |
| mean (SD)                                       | 83.9 (22.4) | 84.1 (24.3) | 0.93  | 84.8 (22.3) | 70.1 (28.0) | <0.001 | <0.001 |
| CF related diabetes, %                          | 7.1         | 3.9         | 0.13  | 15.5        | 19.7        | <0.001 | <0.001 |
| Liver disease, %                                | 0.6         | 1.5         | 0.67  | 4.1         | 4.4         | 0.47   | 0.010  |
| Microbiology                                    | [n=152]     | [n=268]     |       | [n=6,130]   | [n=2,935]   |        |        |
| <i>Staphylococcus aureus</i> , %                | 36.2        | 37.7        | 0.76  | 54.1        | 51.4        | 0.017  | <0.001 |
| <i>Pseudomonas aeruginosa</i> , %               | 29.6        | 21.3        | 0.056 | 49.2        | 57.5        | <0.001 | <0.001 |
| <i>Candida</i> species, %                       | 7.2         | 5.2         | 0.40  | 3.3         | 4.0         | 0.067  | 0.34   |
| <i>Stenotrophomonas maltophilia</i> , %         | 5.3         | 6.0         | 0.76  | 7.7         | 6.6         | 0.071  | 0.69   |
| <i>Aspergillus</i> species, %                   | 3.9         | 3.4         | 0.75  | 8.9         | 7.6         | 0.041  | 0.010  |
| <i>Haemophilus influenzae</i> , %               | 3.3         | 6.0         | 0.23  | 6.1         | 4.6         | 0.003  | 0.31   |
| ≥1 IV treatment for PEx, %                      | 28.2        | 17.3        | 0.006 | 45.9        | 42.3        | <0.001 | <0.001 |
| ≥1 hospitalization, %                           | 21.2        | 14.3        | 0.058 | 40.8        | 38.3        | 0.012  | <0.001 |
| ≥1 home IV antibiotic treatment, %              | 18.6        | 10.7        | 0.017 | 26.3        | 24.1        | 0.014  | <0.001 |
| IV treatment for PEx events/year, mean (SD)     | 0.44 (0.84) | 0.36 (1.12) | 0.40  | 0.87 (1.31) | 1.08 (1.76) | <0.001 | <0.001 |
| Hospitalization events/year, mean (SD)          | 0.32 (0.74) | 0.27 (0.96) | 0.60  | 0.75 (1.22) | 0.92 (1.63) | <0.001 | <0.001 |
| Home IV antibiotic events/year, mean (SD)       | 0.25 (0.60) | 0.19 (0.67) | 0.30  | 0.41 (0.84) | 0.45 (1.02) | 0.012  | <0.001 |
| IV treatment in patients with ≥1 PEx, mean (SD) | 1.57 (0.87) | 2.07 (1.94) | 0.11  | 1.90 (1.33) | 2.56 (1.89) | <0.001 | 0.052  |

\**P*-value obtained from *t*-test or chi-square test. Patients EXCLUDED from the 4-year analysis are all patients not included in the primary analysis and who were born before 2000 and without CFTR related metabolic syndrome (see text). *P*-values for INCLUDED *R117H* vs *F508del* patients are in Table 1.

CF, cystic fibrosis; CFTR, CF transmembrane conductance regulator; BMI, body mass index; max, maximum; min, minimum; ppFEV<sub>1</sub>, percentage of predicted forced expiratory volume in 1 second; IV, intravenous; PEx, pulmonary exacerbation; SD, standard deviation.

**SUPPLEMENTAL TABLE 2: 2-Year Analysis, Age Group Specific Estimated Percentage of Predicted FEV<sub>1</sub> Intercept and Slope for *R117H* Patients and *F508del* Patients.\***

| Parameter                                                          | Estimate | Standard Error | P-value | Lower 95% CI | Upper 95% CI |
|--------------------------------------------------------------------|----------|----------------|---------|--------------|--------------|
| <b>6-12 year olds (<i>R117H</i> n=108, <i>F508del</i> n=4,178)</b> |          |                |         |              |              |
| Intercept (ppFEV <sub>1</sub> )                                    |          |                |         |              |              |
| <i>R117H</i>                                                       | 94.18    | 1.93           | <0.001  | 90.40        | 97.95        |
| <i>F508del</i>                                                     | 88.69    | 0.30           | <0.001  | 88.10        | 89.29        |
| Difference                                                         | 5.48     | 1.95           | 0.005   | 1.66         | 9.31         |
| Slope (ppFEV <sub>1</sub> /year)                                   |          |                |         |              |              |
| <i>R117H</i>                                                       | 0.58     | 0.92           | 0.52    | -1.21        | 2.38         |
| <i>F508del</i>                                                     | -1.29    | 0.13           | <0.001  | -1.55        | -1.04        |
| Difference                                                         | 1.88     | 0.93           | 0.043   | 0.06         | 3.69         |
| <b>13-17 year olds (<i>R117H</i> n=65, <i>F508del</i> n=3,324)</b> |          |                |         |              |              |
| Intercept (ppFEV <sub>1</sub> )                                    |          |                |         |              |              |
| <i>R117H</i>                                                       | 93.32    | 2.76           | <0.001  | 87.91        | 98.73        |
| <i>F508del</i>                                                     | 78.06    | 0.38           | <0.001  | 77.33        | 78.80        |
| Difference                                                         | 15.26    | 2.78           | <0.001  | 9.80         | 20.72        |
| Slope (ppFEV <sub>1</sub> /year)                                   |          |                |         |              |              |
| <i>R117H</i>                                                       | -0.39    | 1.01           | 0.70    | -2.36        | 1.59         |
| <i>F508del</i>                                                     | -2.07    | 0.11           | <0.001  | -2.30        | -1.85        |
| Difference                                                         | 1.69     | 1.02           | 0.096   | -0.30        | 3.68         |
| <b>18-24 year olds (<i>R117H</i> n=65, <i>F508del</i> n=3,258)</b> |          |                |         |              |              |
| Intercept (ppFEV <sub>1</sub> )                                    |          |                |         |              |              |
| <i>R117H</i>                                                       | 85.55    | 3.12           | <0.001  | 79.44        | 91.65        |
| <i>F508del</i>                                                     | 66.73    | 0.42           | <0.001  | 65.91        | 67.55        |
| Difference                                                         | 18.82    | 3.41           | <0.001  | 12.66        | 24.98        |
| Slope (ppFEV <sub>1</sub> /year)                                   |          |                |         |              |              |
| <i>R117H</i>                                                       | -2.50    | 0.99           | 0.012   | -4.45        | -0.56        |
| <i>F508del</i>                                                     | -2.49    | 0.11           | <0.001  | -2.70        | -2.27        |
| Difference                                                         | -0.02    | 1.00           | 0.99    | -1.98        | 1.94         |
| <b>≥25 year olds (<i>R117H</i> n=138, <i>F508del</i> n=2,560)</b>  |          |                |         |              |              |
| Intercept (ppFEV <sub>1</sub> )                                    |          |                |         |              |              |
| <i>R117H</i>                                                       | 73.74    | 1.99           | <0.001  | 69.85        | 77.64        |
| <i>F508del</i>                                                     | 56.21    | 0.45           | <0.001  | 55.33        | 57.09        |
| Difference                                                         | 17.53    | 2.04           | <0.001  | 13.54        | 21.53        |

| Slope (ppFEV <sub>1</sub> /year) |       |      |        |       |       |
|----------------------------------|-------|------|--------|-------|-------|
| <i>R117H</i>                     | -0.59 | 0.58 | 0.32   | -1.73 | 0.56  |
| <i>F508del</i>                   | -1.46 | 0.11 | <0.001 | -1.67 | -1.25 |
| Difference                       | 0.88  | 0.59 | 0.14   | -0.29 | 2.04  |

\*Repeated measures models adjusted for correlation within patient. Starting year of 2-year period and mutation were fixed effects. All 2-way and 3-way interactions were included. CI, confidence interval; ppFEV<sub>1</sub>, percentage of predicted forced expiratory volume in 1 second.
